# Supplementary material for: The effect of light rare earth element substitution in Yb14MnSb11on thermoelectric properties
Source: Royal Society of Chemistry journal article supplement (doi:10.1039/c5tc02326b), 2015-01-01
Supplement: c5tc02326b1.pdf [file c5tc02326b1.pdf]

## The Effect of Light Rare Earth Elements Substitution in $\text{Yb}_{14}\text{MnSb}_{11}$ on Thermoelectric Properties

Yufei Hu<sup>†</sup>, Sabah K. Bux<sup>‡</sup>, Jason Grebenkemper<sup>†</sup>, Susan M. Kauzlarich<sup>\*,†</sup>

<sup>†</sup> *Department of Chemistry, University of California, One Shields Avenue, Davis, California 95616*

<sup>‡</sup> *Jet Propulsion Laboratory, California Institute of Technology, 4800 Oak Grove Drive, Pasadena, California 91109-8099*

### Supporting Information

#### List of Tables and Figures

|                  |                                                                                                                                                                                                                                                                                                                                                                                                                                                                                                     |
|------------------|-----------------------------------------------------------------------------------------------------------------------------------------------------------------------------------------------------------------------------------------------------------------------------------------------------------------------------------------------------------------------------------------------------------------------------------------------------------------------------------------------------|
| <b>SFigure 1</b> | PXRD patterns of $\text{Yb}_{14-p}\text{RE}_p\text{MnSb}_{11}$ ( $\text{RE} = \text{Pr}$ and $\text{Sm}$ , $p = 0.2, 0.4, 0.6, 0.7, 0.8, 0.9, 1$ )                                                                                                                                                                                                                                                                                                                                                  |
| <b>SFigure 2</b> | Element maps of $\text{Yb}_{13.82}\text{Pr}_{0.18}\text{Mn}_{1.01}\text{Sb}_{10.99}$ , $\text{Yb}_{13.59}\text{Pr}_{0.34}\text{Mn}_{1.00}\text{Sb}_{11.08}$ , $\text{Yb}_{13.53}\text{Pr}_{0.45}\text{Mn}_{1.02}\text{Sb}_{10.99}$ , $\text{Yb}_{13.45}\text{Pr}_{0.55}\text{Mn}_{1.03}\text{Sb}_{10.97}$ , $\text{Yb}_{13.80}\text{Sm}_{0.19}\text{Mn}_{1.00}\text{Sb}_{11.02}$ and $\text{Yb}_{13.50}\text{Sm}_{0.53}\text{Mn}_{1.06}\text{Sb}_{10.89}$                                           |
| <b>SFigure 3</b> | Refined PXRD patterns of $\text{Yb}_{13.82}\text{Pr}_{0.18}\text{Mn}_{1.01}\text{Sb}_{10.99}$ , $\text{Yb}_{13.59}\text{Pr}_{0.34}\text{Mn}_{1.00}\text{Sb}_{11.08}$ , $\text{Yb}_{13.53}\text{Pr}_{0.45}\text{Mn}_{1.02}\text{Sb}_{10.99}$ , $\text{Yb}_{13.45}\text{Pr}_{0.55}\text{Mn}_{1.03}\text{Sb}_{10.97}$ , $\text{Yb}_{13.80}\text{Sm}_{0.19}\text{Mn}_{1.00}\text{Sb}_{11.02}$ and $\text{Yb}_{13.50}\text{Sm}_{0.53}\text{Mn}_{1.06}\text{Sb}_{10.89}$ before SPS and after measurement |
| <b>STable 1</b>  | Heat capacity of $\text{Yb}_{13.82}\text{Pr}_{0.18}\text{Mn}_{1.01}\text{Sb}_{10.99}$ , $\text{Yb}_{13.59}\text{Pr}_{0.34}\text{Mn}_{1.00}\text{Sb}_{11.08}$ , $\text{Yb}_{13.53}\text{Pr}_{0.45}\text{Mn}_{1.02}\text{Sb}_{10.99}$ , $\text{Yb}_{13.45}\text{Pr}_{0.55}\text{Mn}_{1.03}\text{Sb}_{10.97}$ , $\text{Yb}_{13.80}\text{Sm}_{0.19}\text{Mn}_{1.00}\text{Sb}_{11.02}$ and $\text{Yb}_{13.50}\text{Sm}_{0.53}\text{Mn}_{1.06}\text{Sb}_{10.89}$                                          |

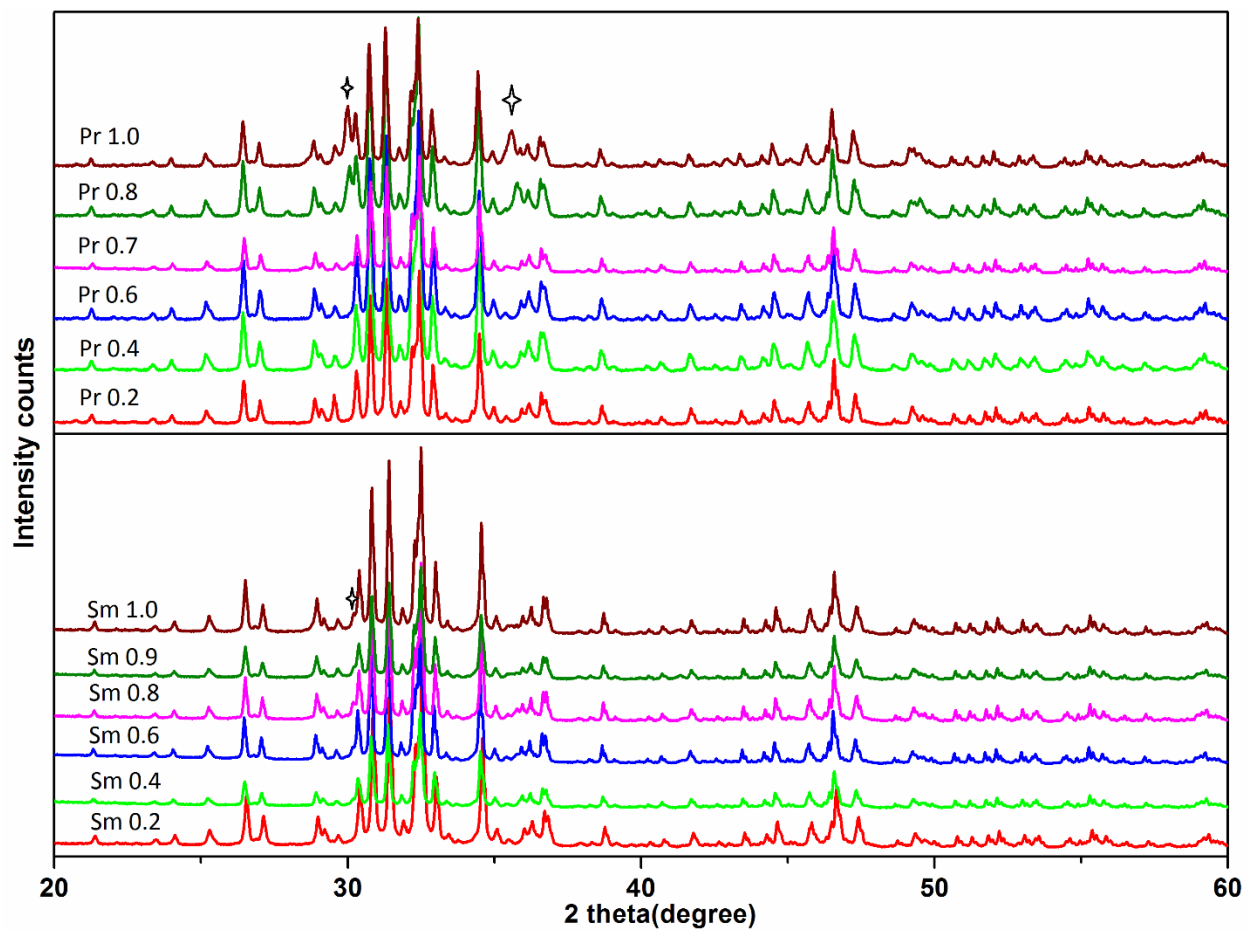

**Figure 1.** a) and b) XRD patterns of  $\text{Yb}_{14-p}\text{RE}_p\text{MnSb}_{11}$  ( $\text{RE} = \text{Pr}$  and  $\text{Sm}$ ,  $p = 0.2, 0.4, 0.6, 0.7, 0.8, 0.9, 1$ ). The star in a) refers to the peaks of  $(\text{Yb},\text{Pr})_4\text{Sb}_3$ .

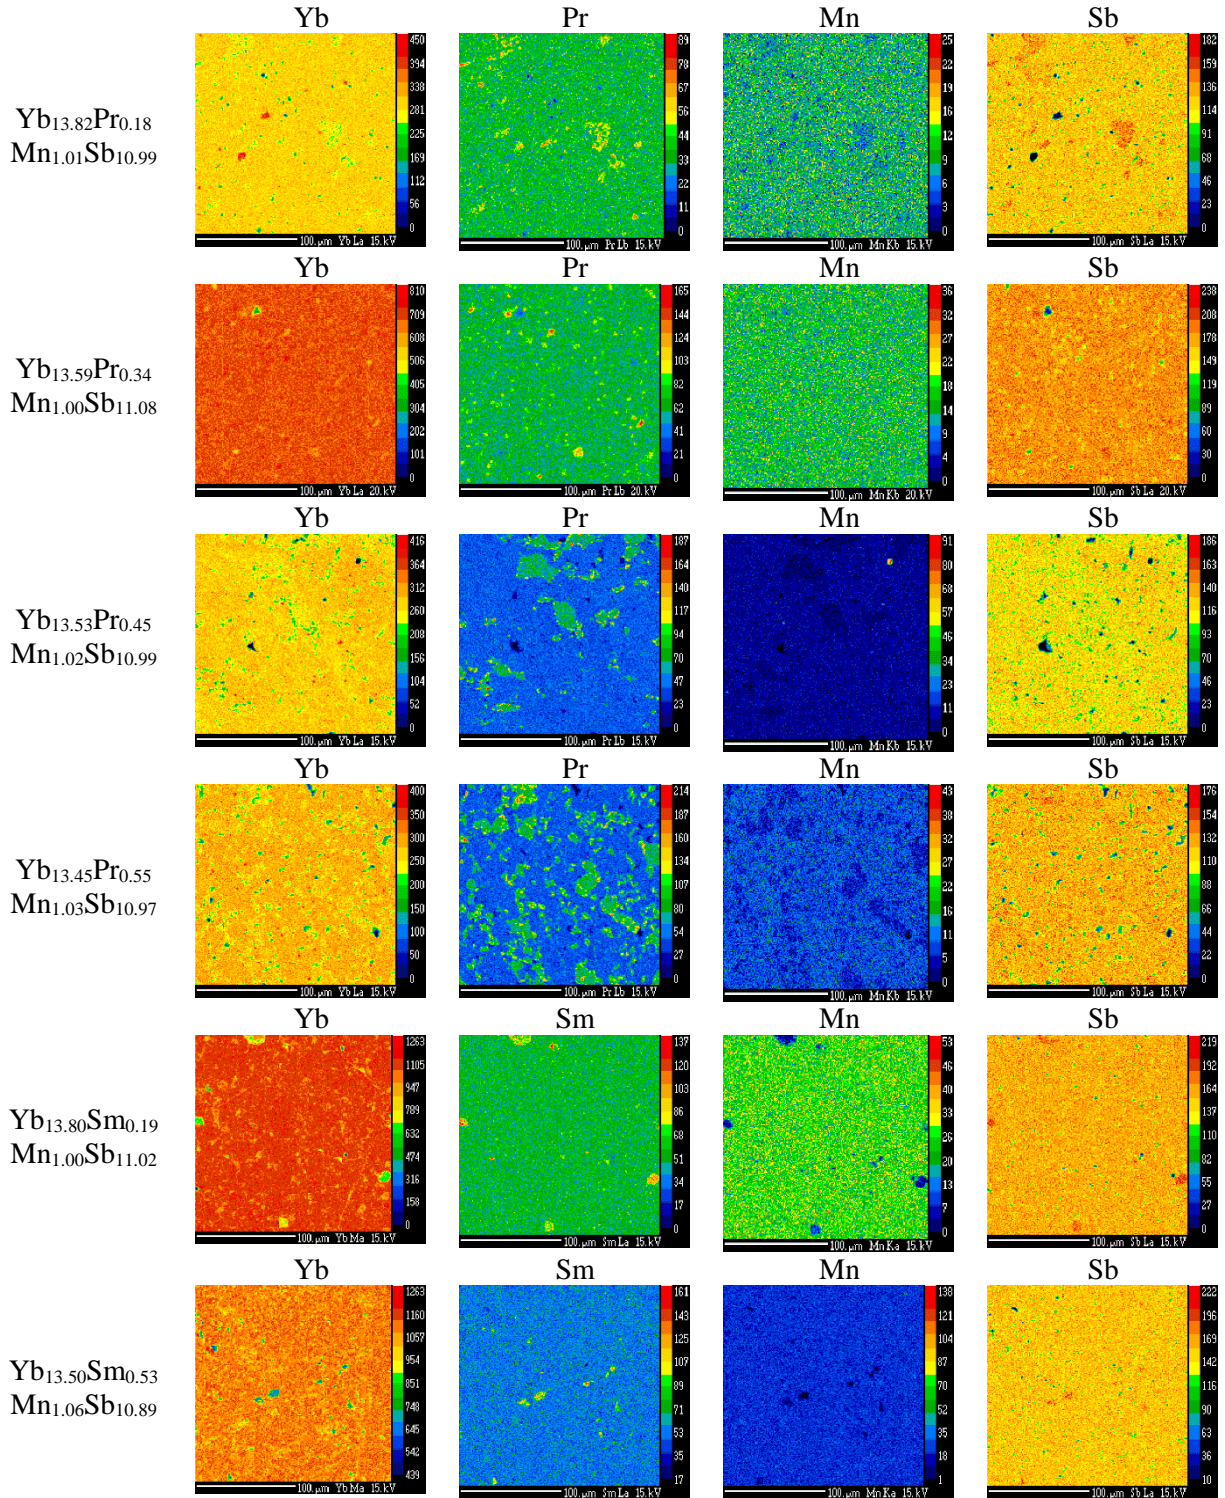

**Figure 2.** Elemental mapping images of Sb, Yb, Mn, Pr of measured pellets. The color in the pictures corresponds to relative amount of elements according to the relative scale provided on the right side of each picture.

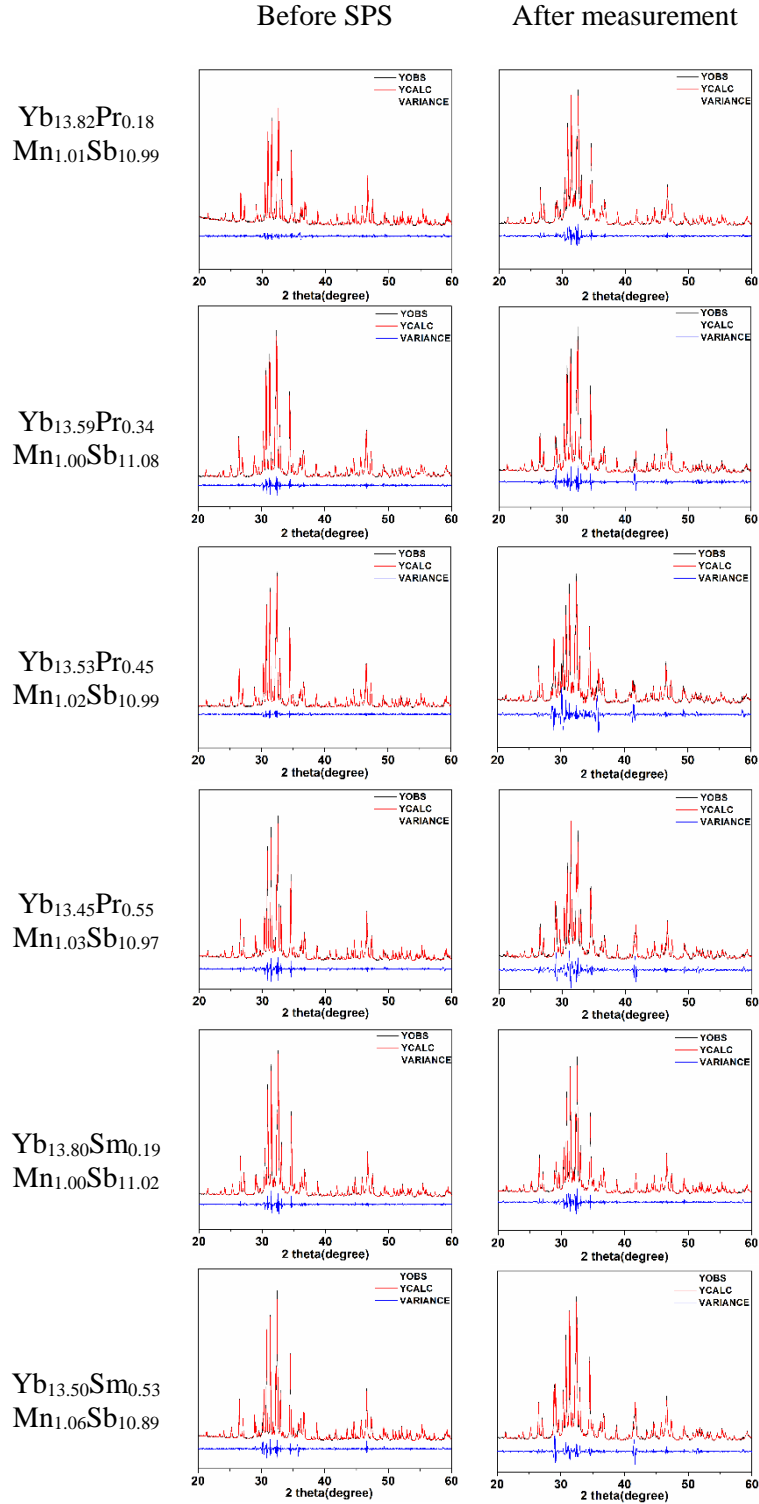

**Figure 3.** Refined PXRD patterns of  $\text{Yb}_{13.82}\text{Pr}_{0.18}\text{Mn}_{1.01}\text{Sb}_{10.99}$ ,  $\text{Yb}_{13.59}\text{Pr}_{0.34}\text{Mn}_{1.00}\text{Sb}_{11.08}$ ,  $\text{Yb}_{13.53}\text{Pr}_{0.45}\text{Mn}_{1.02}\text{Sb}_{10.99}$ ,  $\text{Yb}_{13.45}\text{Pr}_{0.55}\text{Mn}_{1.03}\text{Sb}_{10.97}$ ,  $\text{Yb}_{13.80}\text{Sm}_{0.19}\text{Mn}_{1.00}\text{Sb}_{11.02}$  and  $\text{Yb}_{13.50}\text{Sm}_{0.53}\text{Mn}_{1.06}\text{Sb}_{10.89}$  before SPS after measurement. In the patterns after measurement, the variances at  $29^\circ$  and  $41^\circ$  are attributed to the existence of  $(\text{Yb},\text{RE})\text{Sb}$  and the large variances between  $30^\circ$  to  $35^\circ$  are attributed to  $(\text{Yb},\text{RE})_{11}\text{Sb}_{10}$ .

**Stable 1.** Heat capacity of  $\text{Yb}_{13.82}\text{Pr}_{0.18}\text{Mn}_{1.01}\text{Sb}_{10.99}$ ,  $\text{Yb}_{13.59}\text{Pr}_{0.34}\text{Mn}_{1.00}\text{Sb}_{11.08}$ ,  $\text{Yb}_{13.53}\text{Pr}_{0.45}\text{Mn}_{1.02}\text{Sb}_{10.99}$ ,  $\text{Yb}_{13.45}\text{Pr}_{0.55}\text{Mn}_{1.03}\text{Sb}_{10.97}$ ,  $\text{Yb}_{13.80}\text{Sm}_{0.19}\text{Mn}_{1.00}\text{Sb}_{11.02}$  and  $\text{Yb}_{13.50}\text{Sm}_{0.53}\text{Mn}_{1.06}\text{Sb}_{10.89}$ .

| Temperature<br>(K)                                                   | Heat capacity<br>(J/(g•K)) | Temperature<br>(K)                                                   | Heat capacity<br>(J/(g•K)) | Temperature<br>(K)                                                   | Heat capacity<br>(J/(g•K)) |
|----------------------------------------------------------------------|----------------------------|----------------------------------------------------------------------|----------------------------|----------------------------------------------------------------------|----------------------------|
| $\text{Yb}_{13.82}\text{Pr}_{0.18}\text{Mn}_{1.01}\text{Sb}_{10.99}$ |                            | $\text{Yb}_{13.59}\text{Pr}_{0.34}\text{Mn}_{1.00}\text{Sb}_{11.08}$ |                            | $\text{Yb}_{13.53}\text{Pr}_{0.45}\text{Mn}_{1.02}\text{Sb}_{10.99}$ |                            |
| 301.4                                                                | 0.1812                     | 297.9                                                                | 0.1814                     | 300.3                                                                | 0.1816                     |
| 374.1                                                                | 0.1829                     | 383.3                                                                | 0.1834                     | 372.8                                                                | 0.1833                     |
| 471.3                                                                | 0.1852                     | 478.6                                                                | 0.1856                     | 472.7                                                                | 0.1857                     |
| 575.2                                                                | 0.1877                     | 578.5                                                                | 0.1880                     | 573.0                                                                | 0.1880                     |
| 675.0                                                                | 0.1900                     | 676.3                                                                | 0.1903                     | 673.3                                                                | 0.1904                     |
| 775.6                                                                | 0.1924                     | 774.1                                                                | 0.1926                     | 773.3                                                                | 0.1928                     |
| 874.2                                                                | 0.1947                     | 872.9                                                                | 0.1949                     | 873.2                                                                | 0.1951                     |
| 973.6                                                                | 0.1970                     | 972.2                                                                | 0.1973                     | 972.9                                                                | 0.1975                     |
| 1073.6                                                               | 0.1994                     | 1072.6                                                               | 0.1996                     | 1072.7                                                               | 0.1998                     |
| 1173.4                                                               | 0.2017                     | 1171.3                                                               | 0.2020                     | 1172.7                                                               | 0.2022                     |
| 1273.4                                                               | 0.2041                     | 1272.4                                                               | 0.2044                     | 1222.7                                                               | 0.2034                     |
| $\text{Yb}_{13.45}\text{Pr}_{0.55}\text{Mn}_{1.03}\text{Sb}_{10.97}$ |                            | $\text{Yb}_{13.80}\text{Sm}_{0.19}\text{Mn}_{1.00}\text{Sb}_{11.02}$ |                            | $\text{Yb}_{13.50}\text{Sm}_{0.53}\text{Mn}_{1.06}\text{Sb}_{10.89}$ |                            |
| 300.9                                                                | 0.1818                     | 300.1                                                                | 0.1811                     | 300.1                                                                | 0.1815                     |
| 374.5                                                                | 0.1835                     | 373.0                                                                | 0.1828                     | 372.8                                                                | 0.1832                     |
| 472.4                                                                | 0.1858                     | 472.9                                                                | 0.1852                     | 472.8                                                                | 0.1855                     |
| 577.9                                                                | 0.1883                     | 573.4                                                                | 0.1876                     | 572.9                                                                | 0.1879                     |
| 676.7                                                                | 0.1906                     | 673.4                                                                | 0.1899                     | 673.2                                                                | 0.1903                     |
| 775.7                                                                | 0.1930                     | 773.7                                                                | 0.1923                     | 773.3                                                                | 0.1926                     |
| 875.0                                                                | 0.1953                     | 873.4                                                                | 0.1946                     | 873.0                                                                | 0.1950                     |
| 974.3                                                                | 0.1977                     | 973.4                                                                | 0.1970                     | 973.0                                                                | 0.1974                     |
| 1073.9                                                               | 0.2000                     | 1073.4                                                               | 0.1993                     | 1072.9                                                               | 0.1997                     |
| 1173.8                                                               | 0.2024                     | 1173.4                                                               | 0.2017                     | 1172.8                                                               | 0.2021                     |
| 1273.7                                                               | 0.2048                     | 1273.4                                                               | 0.2040                     | 1222.8                                                               | 0.2032                     |

The molar specific heat is  $C_p = 0.0898T + 663.49$  J/(mol • K). For each sample, their molar weights are used.
